# Supplementary material
Source: PubMed Central journal article supplement (PMC3974591)

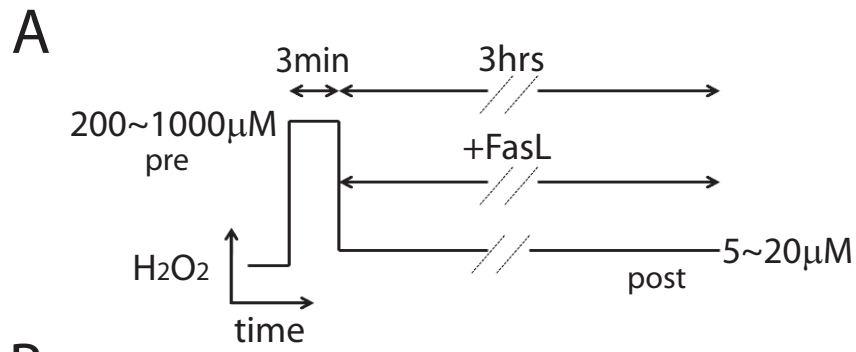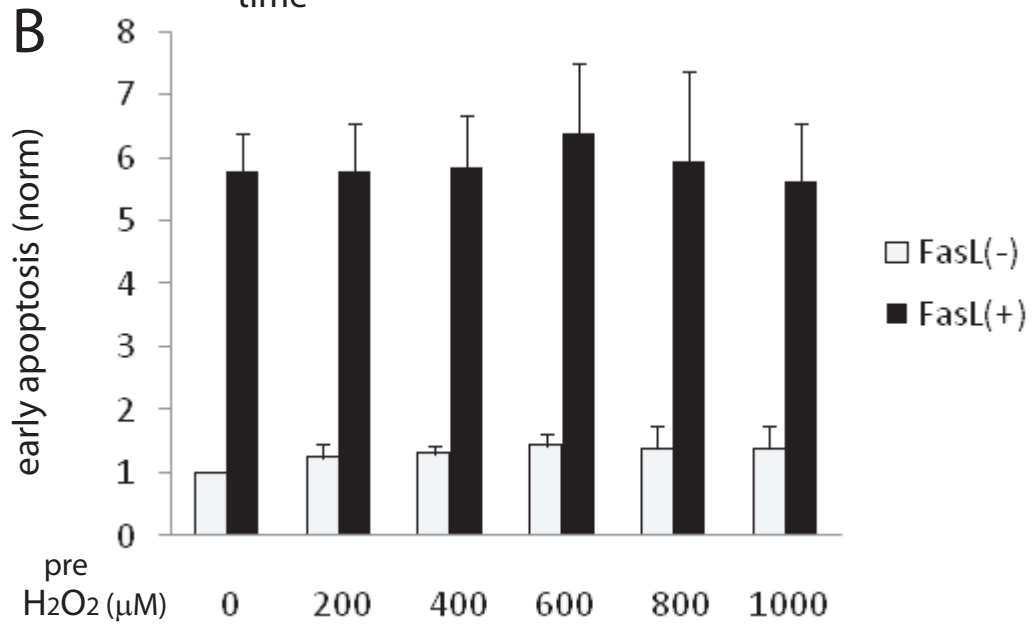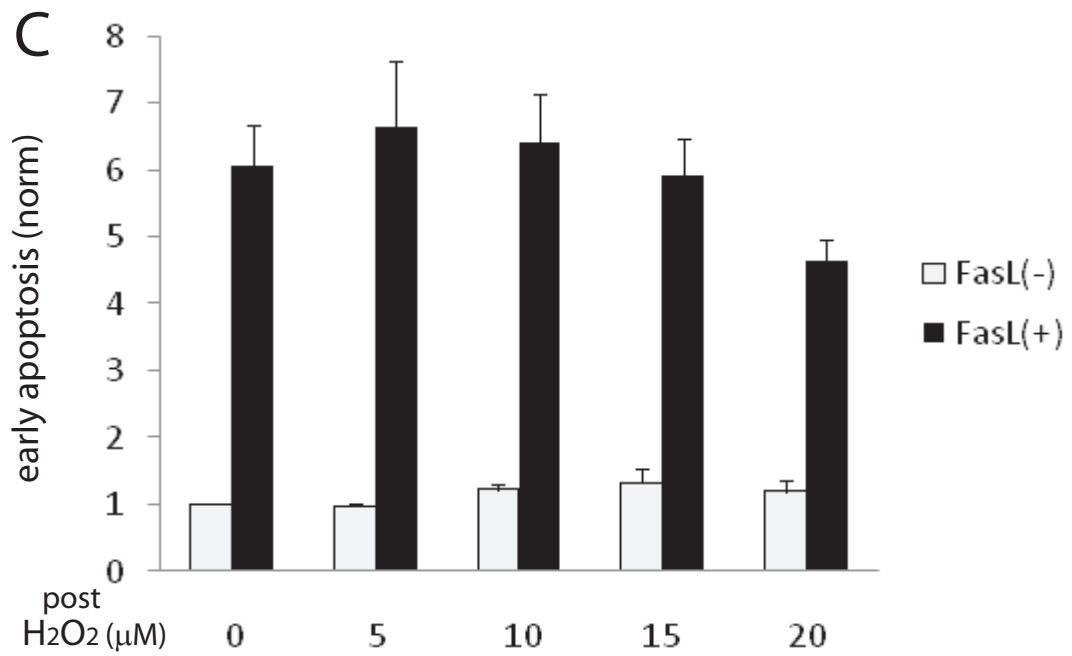

Supplement: NIHMS560397-supplement-01.pdf [file NIHMS560397-supplement-01.pdf]
